# Supplementary material for: Comparing the effects of two different break strategies on occupational sedentary behavior in a real world setting: A randomized trial
Source: PubMed Central journal article supplement — Prev Med Rep. 2016 Aug 9;4:423–8. doi: 10.1016/j.pmedr.2016.08.010 (PMC4995540; doi:10.1016/j.pmedr.2016.08.010), 2016-08-09
Supplement: mmc1.pdf [file mmc1.pdf]

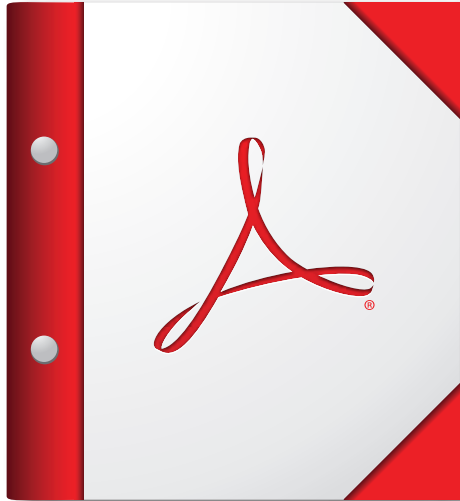

**For the best experience, open this PDF portfolio in  
Acrobat 9 or Adobe Reader 9, or later.**

[Get Adobe Reader Now!](#)
